# Supplementary material for: Why does the signal-to-noise paradox exist in seasonal climate predictability?
Source: Copernicus journal article supplement (doi:10.5194/egusphere-2025-1683), 2025-07-10
Supplement: Supplementary file 1 [file egusphere-2025-1683-supplement.pdf]

# Supporting Information for “Why does the signal-to-noise paradox exist in seasonal climate predictability?”

Yashas Shivamurthy<sup>1,2</sup>, Subodh Kumar Saha<sup>1</sup>, Samir Pokhrel<sup>1</sup>, Mahen Konwar<sup>1</sup>, and Utkarsh Verma<sup>1,2</sup>

<sup>1</sup>Indian Institute of Tropical Meteorology, Pune, India

<sup>2</sup>Savitribai Phule Pune University, Pune, India

**Correspondence:** Subodh Kumar Saha (subodh@tropmet.res.in)

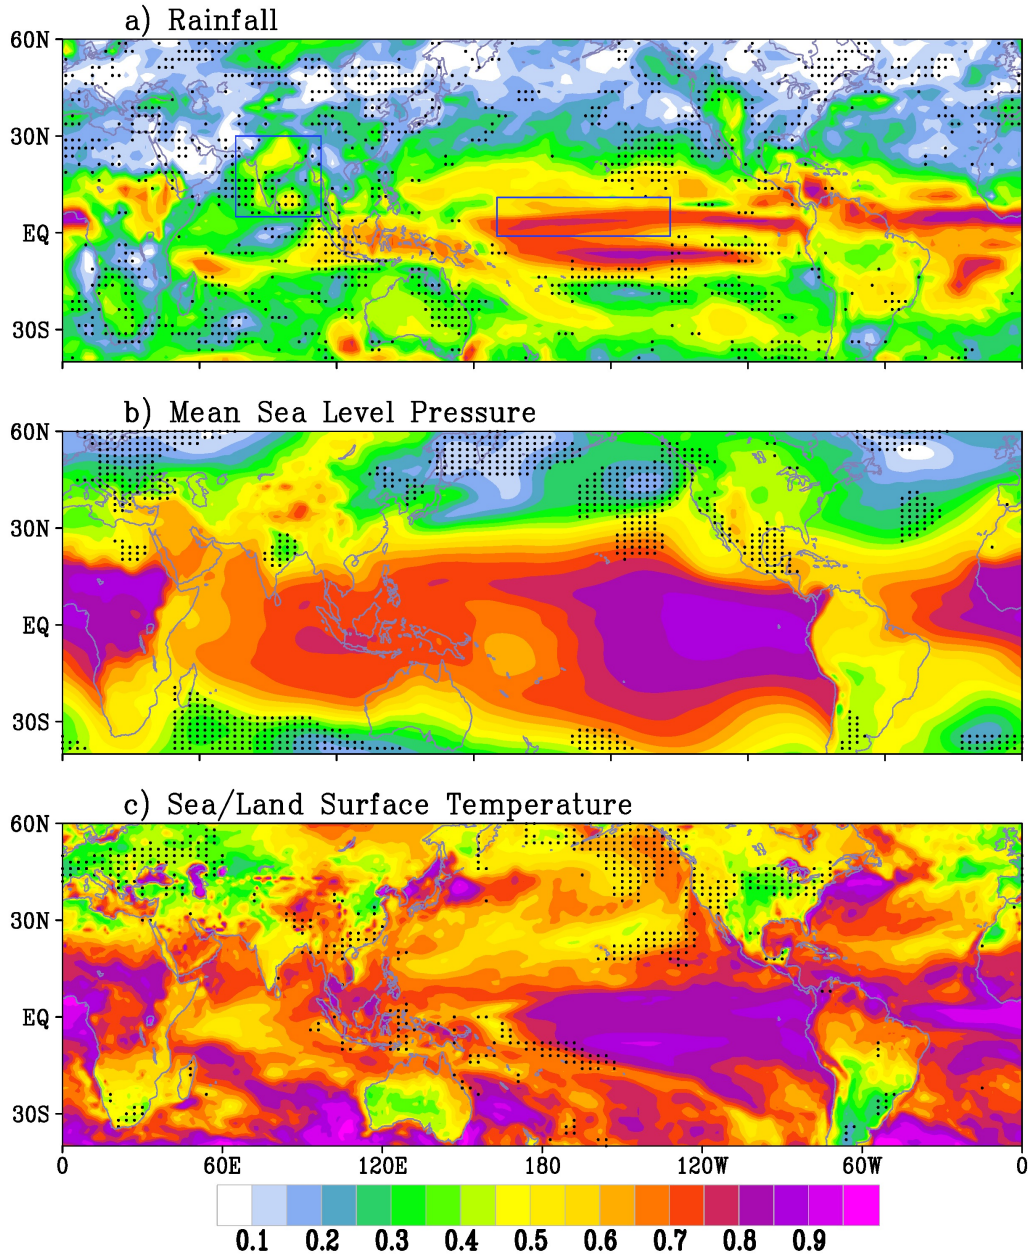

**Figure S1.** Same as Figure 01, but for the time period 1997-2021. Potential predictability based on ANOVA method for JJAS averaged a) rainfall, b) mean Sea level pressure, and c) Sea/land surface temperature using CFSv2 re-forecast of 25 years (1997-2021) and 52 ensemble members. Paradox regions (where model correlation skill with observations is higher than the potential predictability) are stippled. White semi-transparent regions, mostly coinciding with stippled regions, represent  $RPC > 1.0$ .

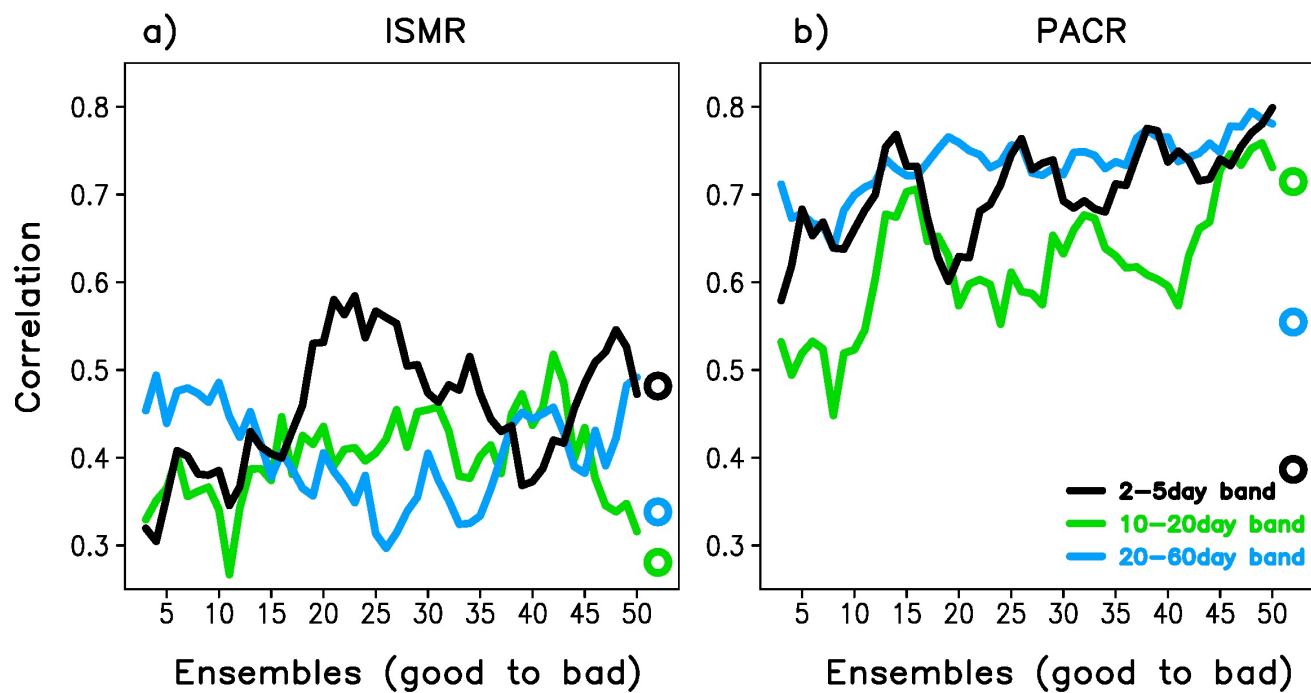

**Figure S2.** Same as Figure 09, but arranged from good to poor ensemble members, showing variation of co-variability between predictant and four predictors. Open circles represent Observed multiple correlation value.
